1 Running head: Bat flight with bad wings

2

3

4 **Bat flight with bad wings:**

5 **Is flight metabolism affected by damaged wing membranes?**

6

7

8 **Christian C. Voigt<sup>1,2,\*</sup>**

9

10 <sup>1</sup>*Leibniz Institute for Zoo and Wildlife Research, Alfred-Kowalke-Str. 17, 10315 Berlin,*

11 *Germany*

12 <sup>2</sup>*Department of Animal Behaviour, Freie Universität Berlin, Berlin, Germany*

13 \*Corresponding author: [voigt@izw-berlin.de](mailto:voigt@izw-berlin.de)

14

## SUMMARY

1  
2 **Infection of North American bats with the keratin-digesting fungus *Geomyces***  
3 ***destructans* often result in holes and ruptures of wing membranes, yet it is unknown if**  
4 **flight performance and metabolism of bats are altered by such injuries. I conducted**  
5 **flight experiments in a circular flight arena in *Myotis albescens* and *M. nigricans* where I**  
6 **observed individuals with intact or ruptured trailing edge of one of the plagiopatagial**  
7 **membranes. In both species, individuals with damaged wings were lighter, had a higher**  
8 **aspect ratio (squared wing span divided by wing area) and an increased wing loading**  
9 **(weight divided by wing area) than conspecifics with intact wings. Bats with an**  
10 **asymmetric reduction of the wing area flew at similar speeds but performed less flight**  
11 **manoeuvres than conspecifics with intact wings. Individuals with damaged wings**  
12 **showed lower metabolic rates during flight than conspecifics with intact wings, even**  
13 **when controlling for body mass differences; the difference in mass-specific metabolic**  
14 **rates may be attributable to the lower number of flight manoeuvres (U-turns) by bats**  
15 **with damaged wings compared to conspecifics with intact wings. Possibly, bats**  
16 **compensated an asymmetric reduction in wing area by lowering their body mass and**  
17 **avoiding flight manoeuvres. In conclusion, bats may not suffer directly from moderate**  
18 **wing damages by experiencing increased metabolic rates but indirectly by a reduced**  
19 **manoeuvrability and foraging success. This could impede a bat's ability to gain**  
20 **sufficient body mass before hibernation.**

21  
22 **Keywords:** energetics, Chiroptera, White-nose syndrome, wing damages

## 1 INTRODUCTION

2 Since the emergence of the keratinophilic fungus *Geomyces destructans*, bats with damaged  
3 wing membranes have been increasingly observed in North American bat populations. This  
4 fungus is the major cause of death in hibernating Vespertilionidae in the U.S.A. and Canada,  
5 causing significant declines in bat populations, most importantly in those of *Myotis lucifugus*,  
6 LeConte 1831 (Blehert et al., 2009; Frick et al., 2010; Dzal et al., 2011). The fungal infection  
7 causes epidermal erosions and ulcers on the wing membrane that may lead to local necrotic  
8 areas (Meteyer et al., 2009). Although wing membranes seem to have a large potential to  
9 recover from fungal infections (Fuller et al., 2009), necrotic tissues may result eventually in  
10 holes or ruptures (Meteyer et al., 2009; Reichard and Kunz, 2009). This may constrain the  
11 flight ability and foraging success of infected bats when emerging from their hibernacula with  
12 partly necrotic wing membranes (Reichard and Kunz, 2009). Ruptures of wing membranes  
13 occur often at the trailing edge of the plagiopatagium – the wing area between the 5<sup>th</sup> digit, the  
14 arm and the body –, possibly because the plagiopatagium is the weakest and most extensible  
15 part of the wing area (Swartz et al., 1996), and because the continuous mechanical stress  
16 imposed by flapping flight on the trailing edge prevents a complete recovery. In contrast to  
17 birds, bats are not able to regenerate their wing area during transitional periods of moult.  
18 Instead, bats with damaged wings are either able to heal the injury (Davies, 1972;  
19 Worthington-Wilmer and Barratt, 1996; Faure et al., 2009; Weaver et al., 2009; Fuller et al.,  
20 2011), carry on with a permanently damaged wing membrane (Davies, 1968), or they are at  
21 risk of dying.

22 To shed light on the energetic constraints that are possibly inflicted by damaged wing  
23 membranes on bats, I investigated how bats with natural asymmetric reductions of the  
24 plagiopatagium perform during flight. Specifically, I asked if a permanent and asymmetric  
25 reduction in wing area increases the metabolic rate during flight and lowers the flight  
26 performance of bats. I studied this question in two tropical species of the genus *Myotis* (*M.*  
27 *albescens*, É. Geoffroy Saint-Hilaire, 1806, and *M. nigricans*, Schinz, 1821). Tropical and  
28 subtropical bats are not infected by *G. destructans* because this fungus is adapted to the cold  
29 temperatures of cave hibernacula in the temperate zone of the Northern Hemisphere.

30 Consequently, the use of tropical *Myotis* enabled me to look at the effect of ruptured wing  
31 membranes on flight performance in the absence of other damages to the wing membrane,  
32 e.g. ulcers and necrotic tissues as described for North American *Myotis* after an infection with  
33 *G. destructans* (Meteyer et al., 2009; Reichard and Kunz, 2009), and also in the absence of  
34 possible immunological responses to an infection with *G. destructans*. In populations of the

1 two study species, I observed individuals with ruptured trailing edges of the plagiopatagium  
2 that caused a significant decline in wing area. These damages were similar to those that have  
3 been previously described for North American *Myotis* suffering from a *G. destructans*  
4 infection (Reichard and Kunz 2009). I hypothesized that a disrupted trailing edge of the  
5 plagiopatagium will alter the metabolic requirements and performance of flying bats, because  
6 the plagiopatagium is important for generating lift and thrust producing vortices (Muijeres et  
7 al., 2008; Song et al., 2008; Hubel and Tropea, 2010). Accordingly, I expected that bats with  
8 an asymmetric reduction of the plagiopatagial area will experience a higher metabolic rate  
9 compared to conspecifics with intact wings because of the lower wing area and because  
10 asymmetric wings may reduce the efficiency of converting muscular work into mechanical  
11 power. Further, I predicted that bats with damaged wings perform less aerial manoeuvres  
12 compared to conspecifics with intact wings. In my experiment, I refrained from altering the  
13 plagiopatagial area of bats experimentally because of ethical reasons, but used instead bats  
14 with naturally damaged plagiopatagiums caused by a ruptured trailing edge. I measured flight  
15 speed and counted the number of flight manoeuvres in a circular flight arena using acoustical  
16 tracking (Voigt and Lewanzik, 2012), and I quantified metabolic rates of flying bats using the  
17 <sup>13</sup>C-labeled Na-bicarbonate method (Hambly et al., 2002, 2004; Voigt et al., 2010, Voigt and  
18 Lewanzik, 2011, 2012; Voigt et al., 2012). To the best of my knowledge, this is the first study  
19 in bats that investigates if flight performance and metabolic rates are affected by damaged  
20 wing membranes. Results of this study are relevant for a better understanding of the direct and  
21 indirect health consequences of *Geomyces destructans* infections in bats.

22

23

## MATERIAL AND METHODS

24

25

26

27

28

29

30

31

32

33

Field work was carried out at La Selva Biological Station in Costa Rica (10° 25' N, 84° 00' W) in November and December 2010. Bats with damaged wing membranes, probably caused by a predator, were encountered during routine mistnetting at daytime roosts of *Myotis albescens* and *M. nigricans*. Both species are common aerial-hawking insectivorous bats in lowland regions of the subtropical and tropical region of the New World, where they forage in the open space of rainforest gaps (Siemers et al., 2001; Rex et al., 2008). Bats were captured between 1700 and 1900 hours in front of buildings, using 6 m and 9 m mist nets (2.5 m height, Ecotone, Gdynia, Poland). I used one individual of *M. albescens* and of *M. nigricans* that each showed a ruptured trailing edge of the left plagiopatagial membrane, and used 10 conspecifics of each species with intact wing membranes for comparison. Bats were

1 transferred to a large box where they were kept at ambient temperature for a maximum of 3  
2 hours until the onset of experiments.

3 I used the NaB technique as originally described by Hambly et al. (2002, 2004) and  
4 further refined by Voigt et al. (2011) and Voigt and Lewanzik (2011, 2012) for instantaneous  
5 measurements of  $^{13}\text{C}$  enrichments in exhaled breath of animals. Experiments in the doughnut-  
6 shaped flight cage (diameter 3.6 m) were performed with one bat at a time. The experimental  
7 setup and protocol is described in Voigt and Lewanzik (2012) and Voigt et al. (2012). After  
8 experiments, I measured the body mass of bats (accuracy: 0.01 g; PM-100, Mettler,  
9 Columbus, OH, U.S.A.). Also, I calculated aspect ratio (squared wing span divided by total  
10 wing area) and wing loading (body mass x gravitational force divided by wing area) based on  
11 digital pictures of the stretched wings (Voigt et al. 2010). Bats were released at the site of  
12 capture after experiments.

### 13 Acquisition and analysis of respirometric and isotopic data

14 While bats tested in the respirometry chamber, I measured the concentration of  $^{13}\text{CO}_2$  and  
15  $^{12}\text{CO}_2$  in the outlet air using a cavity ringdown spectrometer (Picarro, Sunnyvale, CA, USA).  
16 This instrument provides data on total  $\text{CO}_2$  enrichment (ppm) and the enrichment of  $^{13}\text{C}$  in  
17 relation to  $^{12}\text{C}$  in  $\text{CO}_2$  expressed in the delta-notation as parts per mill.

18 For data analysis, I focused on a 20-min period about 3 min after peak enrichment in  
19  $^{13}\text{C}$ . This interval consisted of a pre-flight period (~5 min), the flight period (~5 min,  
20 including transfers) and the post-flight period (~10 min). To calculate the fractional turnover  
21 of  $^{13}\text{C}$  ( $k_c$ ;  $\text{min}^{-1}$ ) in flying bats, I converted delta values into atom% according to Slater et al.  
22 (2001) and computed linear regressions after the least squares methods for the ln-transformed  
23 isotopic data against time for the pre- and post-flight period separately. Based on these  
24 regressions, I extrapolated the  $^{13}\text{C}$  enrichment in the exhaled breath of animals at the onset  
25 and end of the flight period. I calculated  $k_c$  for flying bats according to the following equation:  
26  $k_c = [x^{\text{E}(^{13}\text{C})}_{\text{stop}} - x^{\text{E}(^{13}\text{C})}_{\text{start}}] / t$ , where  $x^{\text{E}(^{13}\text{C})}$  is the  $^{13}\text{C}$  excess enrichment (in atom %) at the  
27 start and stop of the flight period and  $t$  the flight duration (min).  $k_c$  ( $\text{min}^{-1}$ ) was multiplied by  
28 the total body bicarbonate pool  $N_c$  (mol) as calculated by the plateau method (Voigt et al.,  
29 2010; Voigt and Lewanzik, 2011), and converted to carbon dioxide production rate ( $\dot{V}_{\text{CO}_2}$ ; ml  
30  $\text{min}^{-1}$ ) by multiplication with  $22.4 \text{ l mol}^{-1}$ . I applied correction factors as outlined in Hambly  
31 and Voigt (2011), Voigt and Lewanzik (2011, 2012) based on pre-flight  $\dot{V}_{\text{CO}_2}$  as measured by  
32 the isotopic and respirometric method and based on isotopic estimates of  $\dot{V}_{\text{CO}_2}$  during the flight

1 period. A bivariate plot of resting  $\dot{V}_{co_2}$  (pre-flight period) supported a high precision of this  
2 methodological approach ( $r^2 = 0.88$ ,  $P < 0.001$ ).

### 3 **Acquisition and analysis of acoustical data**

4 For estimating the flight speed and the number of U-turns of flying bats, I used the sequence  
5 of echolocation calls recorded by eight adjacent microphones as described in Voigt and  
6 Lewanzik (2012).

### 7 **Statistical analysis**

8 Before performing parametric tests, I checked if requirements for parametric testing were  
9 fulfilled. To test if morphology (body mass, aspect ratio, wing loading), flight performance  
10 (speed and number of U-turns) and metabolism (metabolic rate, costs of transport) differed  
11 between individuals with intact and damaged wing membranes, I calculated one-sample  
12 student t-tests for each species separately. For all tests, I used Systat (Version 11), assuming  
13 an alpha value of 5%. Data are presented as means  $\pm$  one standard deviation if not stated  
14 otherwise.

## 15 **RESULTS**

16 In both study species, *Myotis albescens* and *M. nigricans*, I captured one individual with a  
17 damaged left plagiopatagial wing membrane. In *M. albescens*, the trailing edge of the left  
18 plagiopatagium was ruptured proximally close to the abdomen so that the area was reduced by  
19 21% in relation to the right plagiopatagium (Fig. 1). Consequently, the total left wing area  
20 was smaller by 13% than the right wing area (Table 1). In *M. nigricans*, the left  
21 plagiopatagium was as well damaged by a similar rupture of the trailing edge; yet in *M.*  
22 *nigricans* the rupture was more distally, close to the 5<sup>th</sup> digit. This rupture caused a 20%  
23 reduction in the left plagiopatagial area in relation to the right plagiopatagium, and a 13%  
24 reduction in left wing area compared to the right wing area (Table 1, Fig. 1). Both individuals  
25 with damaged wings weighed less than their conspecifics (Table 2). Wing loading and aspect  
26 ratio of bats with damaged wing membranes were significantly higher than those of 10  
27 healthy conspecifics (Table 2).  
28

29 Resting metabolic rates were not significantly different between pre- and post-flight  
30 periods (*M. albescens*: paired Student t-test:  $t_9 = 0.81$ ,  $P = 0.442$ ; *M. nigricans*: paired Student  
31 t-test:  $t_9 = 0.28$ ,  $P = 0.785$ ). In *M. albescens*, resting metabolic rates averaged  $0.22 \pm 0.10$  ml  
32  $CO_2 \text{ min}^{-1}$  during pre-flight and  $0.20 \pm 0.06$  ml  $CO_2 \text{ min}^{-1}$  during post-flight periods.

1 Corresponding numbers read  $0.27 \pm 0.12 \text{ ml CO}_2 \text{ min}^{-1}$  for the pre-flight and  $0.28 \pm 0.14 \text{ ml}$   
2  $\text{CO}_2 \text{ min}^{-1}$  for the post-flight period of *M. nigricans*.

3 Injection of  $^{13}\text{C}$ -labelled Na-bicarbonate caused a sharp increase in  $^{13}\text{C}$  enrichment in  
4 the exhaled breath (Fig. 2). Following a plateau after a few minutes post-injection,  $^{13}\text{C}$   
5 enrichments in the exhaled breath decreased exponentially. The flight interval caused an  
6 abrupt decline in  $^{13}\text{C}$  enrichment when pre-flight and post-flight enrichments are compared.  
7 Fractional turnover rates during flight intervals averaged  $0.618 \pm 0.139 \text{ min}^{-1}$  for *M. albescens*  
8 and  $0.573 \pm 0.124 \text{ min}^{-1}$  for *M. nigricans*. Fractional turnover rates were 8.7 times higher  
9 during flight than during rest in *M. albescens* and 9.2 times higher in *M. nigricans*.

10 During flight experiments, bats with damaged wings flew at a similar speed compared  
11 to conspecifics with intact wings (Table 2). Yet, bats with damaged wings performed less U-  
12 turns in the circular flight arena than conspecifics with intact wings (Table 2). In both species,  
13 flight metabolism ( $\text{ml CO}_2 \text{ min}^{-1}$ ) was lower in individuals with damaged wings than in  
14 individuals with intact wings (Table 2). When controlling for variation in body masses,  
15 differences in metabolic rates were still either marginally (*M. nigricans*) or significantly  
16 different (*M. albescens*) between bats with damaged and intact wing membranes (Table 2).

## 17 18 **DISCUSSION**

19 Bats have delicate wing membranes that may get permanently damaged by ruptures of the  
20 membrane edge or by punctures. These damages may constrain the ability of a bat to fly  
21 efficiently and thus may increase the metabolic rate of aerial locomotion. To the best of my  
22 knowledge, this study is the first to address the question if flight performance and metabolic  
23 rate of bats is affected by a permanent and asymmetric reduction in wing area. An asymmetric  
24 reduction of wing area could result in increased flight metabolism because of increased aspect  
25 ratio and wing loading (Voigt, 2000), and because of the asymmetric force production of the  
26 left and right wing.

27 In partial agreement with the predictions, I found that bats with damaged wing membranes  
28 performed less U-turns than conspecifics with intact wing membranes when flying in the  
29 circular flight arena, yet I can not rule out the possibility that I selected individuals from the  
30 local population that were less agile and therefore became victim to a predator, causing the  
31 rupture of the edge of the plagiopatagium. Thus, it remains unclear whether the wing damage  
32 or a predisposition caused the lower manoeuvrability. The overall flight speed of bats over the  
33 1-min period was similar in individuals with damaged and intact wings. In contrast to my  
34 prediction, flight metabolism was lower in bats with damaged wing membrane than in healthy

1 conspecifics. This difference may have originated from the fact that bats with damaged wings  
2 weighed less than conspecifics with intact wings. However, the difference in flight  
3 metabolism was still marginal (*M. nigricans*) or significant (*M. albescens*) when taking the  
4 variation in body mass into account. Thus, variation in body mass explained only partly  
5 differences in flight metabolism between bats with damaged wing membranes and healthy  
6 conspecifics. Presumably, bats with damaged wings showed a lower flight metabolism  
7 because they performed less flight manoeuvres than bats with intact wings. It is noteworthy  
8 that the pattern of reduced flight performance, metabolism and body mass was the same in  
9 both species.

10 Two scenarios may explain the lower body mass of bats with damaged wings. Body mass  
11 reductions might be a compensatory mechanism of bats to avoid increased metabolic rates  
12 when wing area is permanently reduced. Alternatively, bats with damaged wing membranes  
13 had lower body mass because they were less efficient during foraging, leading to a decline in  
14 body reserves. Since I captured free-ranging bats with naturally occurring wing damages, I  
15 can not reject or accept any of the two hypotheses. However, bats with damaged wing  
16 membranes performed less U-turns in the flight arena, and this may indicate that the flight  
17 ability of bats may be indeed constrained by a damaged trailing edge of the plagiopatagium.  
18 Recent experiments in another vespertilionid flying in the same circular flight arena  
19 confirmed that the number of aerial manoeuvres decreased with increasing wing loading  
20 (Voigt and Lewanzik, 2012). Unfortunately, it remains uncertain in the current study what the  
21 cause and effect is regarding the relationship between wing area reduction and change in body  
22 mass. Interestingly, severe wing damages caused by *G. destructans* infections were also  
23 associated with a lowered body mass (Reichard et al., 2009), suggesting that foraging success  
24 of temperate zone *Myotis* species may as well suffer from damaged wings or that bats may  
25 use a strategy of body mass loss. Wing membranes are not only important for producing lift  
26 and thrust in flying bats, but also for other physiological process, such as evaporative water  
27 loss (Speakman and Racey, 1989; Thomas and Cloutier, 1992), thermoregulation (Speakman  
28 and Hays, 1992; Reichard et al., 2009) and possibly also respiration (Herreid et al., 1968;  
29 Makanya and Mortola, 2007). Recently, it was also shown that wing membranes carry  
30 important sensory hairs that most likely help bats to perceive and control air flow around  
31 wing membranes (Chadha et al., 2010). Yet, it is unclear if a reduction of the wing area of  
32 about 10% may significantly influence any of the aforementioned processes in bats of the  
33 current study.



1           Thus far, questions related to performance and metabolic rates of vertebrates flying  
2 with damaged wings have only been looked at in birds that suffered from partial losses of  
3 feathers during seasonal moult. Bird feathers usually wear down according to their intrinsic  
4 robustness and the mechanical stress they are exposed to during flight. During moult, wing  
5 areas of birds often get smaller when lost feathers cause so-called moult gaps. For birds with  
6 moult gaps, aerodynamic theory predicts an increase in metabolic requirements for continuous  
7 horizontal flight (Hedenström and Sunada, 1999; Hedenström, 2003). Yet, past studies  
8 showed controversial results with respect to flight performance and metabolic rate of  
9 moulting birds. For example, studies in hummingbirds have highlighted that moulting  
10 individuals are able to tolerate a 30% loss in wing area without any changes in flight  
11 metabolism, yet this was mainly achieved by a reduction in body mass (Chai, 1997), a pattern  
12 that is also apparent in the experiments with *Myotis*. In addition, moulting hummingbirds  
13 experienced a reduction in flight efficiency and performance (Chai, 1997; Chai and Dudley,  
14 1999). Another study supported that moulting hummingbirds reduced their body mass and  
15 experienced a lower aerodynamic force production and flight speed when they lost primary  
16 flight feathers (Chai et al., 1999). However, high-speed video-recordings of take-off flights in  
17 birds suggested that European starlings did not experience a lowered flight performance  
18 during moult (Williams and Swaddle, 2003).

19           In summary, individuals of two species of *Myotis* that had a damaged trailing edge of  
20 the plagiopatagium showed a decrease in flight metabolism, probably resulting from a lower  
21 number of energetically costly flight manoeuvres. Presumably, bats lowered their body mass  
22 to compensate for the higher aspect ratio and wing loading when parts of the plagiopatagial  
23 wing area are lost. Alternatively, bats suffer from reduced foraging success when their wing  
24 area is reduced and this may in consequence lead to a lower body mass and flight metabolism.  
25 Since I did not reduce the wing area of individual bats experimentally because of ethical  
26 considerations, it is not possible to distinguish between these two scenarios. Also, it is  
27 important to keep in mind that *Geomyces* inflicted damages to the wing membrane vary  
28 largely and that infected bats may encounter varying problems of limited manoeuvrability  
29 depending on the specific location and extent of the damage. A lowered body mass associated  
30 with a reduced wing area could have drastic consequences for the survival of vespertilionid  
31 bats when facing adverse environmental conditions. Presumably, these bats may lack  
32 sufficient body reserves to survive extended periods of torpor. This may exacerbate the effect  
33 of fungal infections in North American bats when they depend on crucial body reserves for  
34 hibernation.

1

2 I thank Daniel Lewanzik, Ivailo Borrisov, Karin Schneeberger and Silke Voigt-Heucke for help in the  
3 field, Stephanie Zimmer for help in analysing the acoustical files and Doris Fichte for quantifying the  
4 wing morphology of bats. I am grateful for the support of the Organization for Tropical Studies,  
5 particularly the staff of La Selva Biological Station. Experiments complied with current laws in Costa  
6 Rica.

7

8

## 9 **LIST OF ABBREVIATIONS**

10  $\text{CO}_2$  = carbon dioxide

11  $k_c$  = fractional turnover of  $^{13}\text{C}$  label ( $\text{min}^{-1}$ )

12  $t$  = duration of flight (s)

13  $\dot{V}_{\text{CO}_2}$  = carbon dioxide production rate ( $\text{ml min}^{-1}$ )

14  $v$  = flight speed ( $\text{m s}^{-1}$ )

15  $x(^{13}\text{C})$  =  $^{13}\text{C}$  enrichment (atom%)

16  $x^E(^{13}\text{C})_{\text{start}}$  = excess  $^{13}\text{C}$  enrichment (atom%) at the start of the flight period

17  $x^E(^{13}\text{C})_{\text{stop}}$  = excess  $^{13}\text{C}$  enrichment (atom%) at the end of the flight period

18

## REFERENCES

- 1  
2 **Blehert, D.S., Hicks, A.C., Behr, M., Meteyer, C.U., Berlowski-Zier, B.M., Buckles, E.L.,**  
3 **coleman, J.T.H., Darling, S.R., Gargas, A., Niver, R., Okoniewski, J.C., Rudd, R.J.**  
4 **and Stone, W.B.** (2009) Bat white-nose syndrome: An emerging fungal pathogen?  
5 *Science* **323**, 27.
- 6 **Chadha, M., Moss, C.F., and Sterbing-D'Angelo, S.J.** (2011) Organization of the primary  
7 somatosensory cortex and wing representation in the big brown bat, *Eptesicus fuscus*. *J.*  
8 *Comp. Physiol. A* **197**:89-96.
- 9 **Chai, P.** (1997) Hummingbird hovering energetics during moult of primary flight feathers. *J.*  
10 *Exp. Biol.* **200**, 1527-1536.
- 11 **Chai, D. Altshuler, D.K., Stephens, D.B. and Dilon, M.E.** (1999) Maximal horizontal flight  
12 performance of hummingbirds. Effects of body mass and molt. *Physiol. Biochem. Zool.*  
13 **72**, 145-155.
- 14 **Chai, D. and Dudley, R.** (1999) Maximum flight performance of hummingbirds: capacities,  
15 constraints , and trade-offs. *Amer. Nat.* **153**, 398-411.
- 16 **Cryan P, M., Meteyer, C.U., Boyles, J.G. and Blehert, D.S.** (2010) Wing pathology of  
17 white-nose syndrome in bats suggests life-threatening disruption of physiology. *BMC Biol*  
18 **8**, 135.
- 19 **Dzal, Y., McGuire, L.P, Veselka, N. and Fenton, M.B.** (2011) Going, going, gone: the  
20 impact of white-nose syndrome on the summer activity of the little brown bat (*Myotis*  
21 *lucifugus*). *Biol. Lett.* **7**, 392-394.
- 22 **Davies, R.** (1968) Wing defects in a population of pallid bats. *Amer. Midl. Natural.* **79**, 388-  
23 392.
- 24 **Davies, R.** (1972) Wing repair in pallid bats. *J. Mammal.* **53**, 377-380.
- 25 **Faure, PA., Re, D.E. and Clare, E.L.** (2009) Wound healing in the flight membranes of big  
26 brown bats. *J. Mammal.* **90**, 1148-1156.
- 27 **Frick, W.F., Pollock, J.F., Hicks, A.C., Langwig, K.E., Reynolds, D.S., Turner, G.G.,**  
28 **Butchkoski, C.M. and Kunz, T.H.** (2010) An emerging disease cause regional  
29 population collapse of a common North American bat species. *Science* **329**, 679-682.
- 30 **Fuller, N.W., Reichard, J.D., Nabhan, M.L., Fellows, S.R., Pepin, L.C. and Kunz, T.H.**  
31 (2011) Free-ranging little-brown myotis (*Myotis lucifugus*) heal from wing damage  
32 associated with white-nose syndrome. *Ecohealth* **8**, 154-162.
- 33 **Hambly, C. and Voigt, C.C.** (2011) Measuring energy expenditure in birds using bolus  
34 injections of <sup>13</sup>C labelled Na-bicarbonate. *Comp. Biochem. Physiol. A.* **158**, 323-328

- 1 **Hambly, C., Harper, E.J. and Speakman, J.R.** (2002) Cost of flight in the zebra finch  
2 (*Taenopygia guttata*): a novel approach based on elimination of  $^{13}\text{C}$  labelled bicarbonate.  
3 *J. Comp. Physiol. B* **172**, 529-539.
- 4 **Hambly, C., Pinshow, B., Wiersma, P., Verhulst, S., Piertney, S.B., Harper, E.J. and**  
5 **Speakman, J.R.** (2004) Comparison of the cost of short flights in a nectarivorous and a  
6 non-nectarivorous bird. *J. Exp. Biol.* **207**, 3959-3968.
- 7 **Hedenström, A. and Sunada, S.** (1999) On the aerodynamicis of moult gaps in birds. *J Exp.*  
8 *Biol.* **202**, 67-76.
- 9 **Hedenström, A.,** (2003) Flying with holey wings. *J. Avian Biol.* **34**, 324-327.
- 10 **Herreid, C.F., Bretz, W.L. and Schmidt, N.K.** (1968) Cutaneous gas exchange in bats. *Am.*  
11 *J. Physiol.* **215**, 506-???
- 12 **Hubel, T.Y. and Tropea, C.** (2010) The importance of leading edge vortices under  
13 simplified flapping flight conditions at the size scale of birds. *J. Exp. Biol.* **213**: 1930-  
14 1939.
- 15 **Song, A., Tian, X.D., Israeli, E., Galvao, R., Bishop, K., Swartz, S. and Breuer, K.** (2008)  
16 Aeromechanics of membrane wings with implications for animal flight. *AIAA J.* **46**, 2096-  
17 2106.
- 18 **Swartz, S.M., Groves, M.S., Kim, H.D. and Walsh, W.R.** (1996) Mechanical properties of  
19 bat wing membrane skin. *J. Zool.* **239**, 357-378.
- 20 **Makanya, A.N. and Mortola, J.P.** (2007) The structural design of the bat wing web and its  
21 possible role in gas exchange. *J. Anat.* **211**, 687-697.
- 22 **Meteyer, C.U., Buckles, E.L., Blehert, D.S., Hicks, A.C, Green, D.E., Shearn-Bochseler,**  
23 **V., Thomas, N.J., Gargas, A. and Behr, M.H.** (2009) Histopathologic criteria to confirm  
24 white-nose syndrome in bats. *J. Vet. Diagn. Invest.* **21**, 411-414.
- 25 **Muijres, F.T., Johansson, L.C., Barfield, R., Wolf, M., Spedding, G:R. and Hedenström.**  
26 **A** (2008) Leading-edge vortex improves lift in slow-flying bats. *Science* **319**, 1250-1253.
- 27 **Reichard, J.D. and Kunz, T.H.** (2009) White-nose-syndrome inflicts injuries to the wings of  
28 little brown myotis (*Myotis lucifugus*). *Acta Chiropterol.* **11**, 457-464.
- 29 **Reichard, J.D., Fellows, S.R. Frank, A.J. and Kunz, T.H.** (2010) Thermoregulation during  
30 flight: Body temperature and sensible heat transfer in free-ranging Brazilian free-tailed  
31 bats (*tadarida brasiliensis*): *Physiol. Biochem. Zool.* **83**, 885-897.
- 32 **Rex, K., Kelm, D.H., Wiesner, K., Matt, F., Kunz, T.H. and Voigt, C.C.** (2008) Structure  
33 of three Neotropical bat assemblages. *Biol. J. Linn. Soc.* **94**, 617-629.

- 1 **Siemers, B.M., Kalko, E.K.V. and Schnitzler, H.-U.** (2001) Echolocation behavior and  
2 signal plasticity in the Neotropical bat *Myotis nigricans* (Schinz, 1821) (Vespertilionidae):  
3 A convergent case with European species of *Pipistrellus*? *Behav. Ecol. Sociobiol.* **50**, 317-  
4 328.
- 5 **Speakman, J.R. and Hays, G.C.** (1992) Albedo and transmittance of short-wave radiation  
6 for bat wings. *J. Therm. Biol.* **17**, 317.
- 7 **Thomas, D.W. and Cloutier, D.** (1992) Evaporative water loss by hibernating little brown  
8 bats, *Myotis lucifugus*. *Physiol. Zool.* **65**, 443-456.
- 9 **Voigt, C.C.** (2000) Intraspecific scaling of flight costs in the bat *Glossophaga soricina*  
10 (Phyllostomidae). *J. Comp. Physiol. B.* **170**, 403-410
- 11 **Voigt, C.C. and Holderied, M.W.** (2012) High manoeuvring costs force narrow-winged  
12 molossid bats to forage in open space. *J. Comp. Physiol. B* **182**, 415-424.
- 13 **Voigt, C.C. and Lewanzik, D.** (2011) Trapped in the darkness of the night: Thermal and  
14 energetic constraints of daylight flight in bats. *Proc. Roy. Soc. Lond.: Biol. Sci.* **278**, 2311-  
15 2317.
- 16 **Voigt, C.C., and Lewanzik, D.** (2012) 'No cost for echolocation in flying bats' revisited  
17 *Journal of comparative Physiology B*
- 18 **Voigt, C.C., Schuller, B.M., Greif, S. and Siemers, B.M.** (2010) Perch-hunting in  
19 insectivorous *Rhinolophus* bats is related to the high energy costs of manoeuvring in  
20 flight. *J. Comp. Physiol. B* **180**, 1079-1088.
- 21 **Voigt, C.C., Schneeberger, K., Voigt-Heucke, S.L. and Lewanzik, D.** (2011) Rain  
22 increases the energy cost of bat flight. *Biol. Lett.* **7**, 793-795.
- 23 **Voigt, C.C., Borrisov, I.M., and Voigt-Heucke, S.L.** (2012) Terrestrial locomotion imposes  
24 high metabolic requirements on bats. *J. Exp Biol* **215**, 4340-4344.
- 25 **Weaver, K.N., Alfano, S.E., Kronquist, A.R. and Reeder, D.M.** (2009) Healing rates of  
26 wing punch wounds in free-ranging little brown myotis (*Myotis lucifugus*). *Acta*  
27 *Chiropterol.* **11**, 220-223.
- 28 **Worthington-Wilmer, J. and Barratt, E.** (1996) A non-lethal method of tissue sampling for  
29 genetic studies of chiropterans. *Bat Res. News* **37**, 1-3.
- 30

1 **Figure captions:**

2 Fig 1: Pictures of the dorsal view of *Myotis albescens* (top) and *M. nigricans* (bottom) with a  
3 ruptured trailing edge of the left plagiopatagial membrane. The counter line of the right wing  
4 area was copied over the left wing area to better illustrate the wing damage to the left  
5 plagiopatagium. Note that wing punctures were taken with sterile biopsy punches in the right  
6 wing after the experiments.

7  
8 Fig. 2: Two examples of respirometric and isotopic measurements: *Myotis albescens* (*Ma*; **A**,  
9 **C**) and *M. nigricans* (*Mb*; **B**, **D**). The top graphs (**A**, **B**) show the metabolic rate ( $\text{CO}_2 \text{ min}^{-1}$ )  
10 of resting animals during the course of the experiment. The bottom graphs (**C**, **D**) shows the  
11 excess enrichment of  $^{13}\text{C}$  (ln-scale) in the breath of animals. Due to the contamination of  
12 chamber air with ambient  $\text{CO}_2$  when animals are transferred back to the chamber after the  
13 flight trial, metabolic rate and  $^{13}\text{C}$  excess enrichment could not be monitored for about 3 min  
14 after the flight trial. The excess  $^{13}\text{C}$  enrichment of exhaled breath was extrapolated for the  
15 onset and end of the flight period (indicated by a gray box) based on two least squares linear  
16 regressions (blue lines calculated over 3 min periods of the pre-flight period and 10 min of the  
17 post-flight period). The fractional turnover of the  $^{13}\text{C}$  label of the flying bat is indicated by the  
18 pink dashed line.

19

20 Fig. 3. Flight metabolism ( $\text{ml CO}_2 \text{ min}^{-1}$ ; **A**) and mass specific flight metabolism ( $\text{ml CO}_2 \text{ g}^{-1}$   
21  $\text{min}^{-1}$ ; **B**) for flying *Myotis albescens* and *M. nigricans* with intact wing membranes.  
22 Corresponding values for conspecifics with damaged wing membrane are indicated by a  
23 dashed line.

24

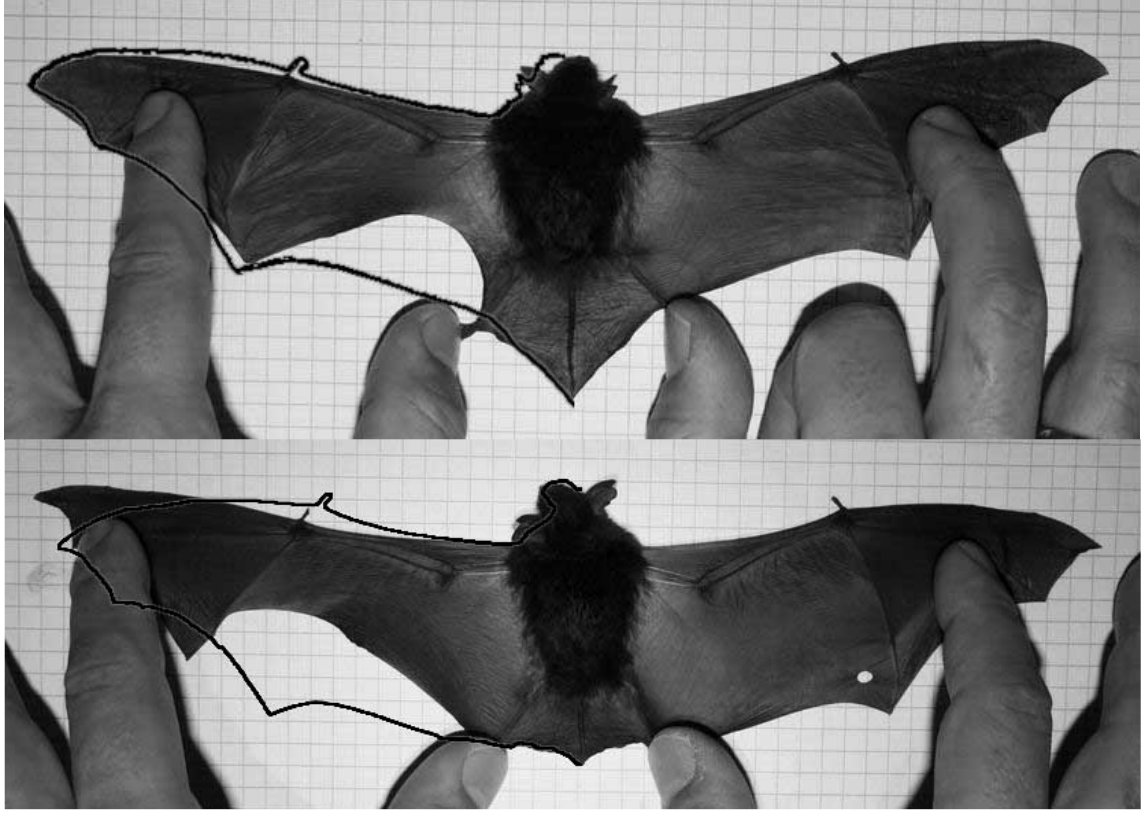

Figure 2

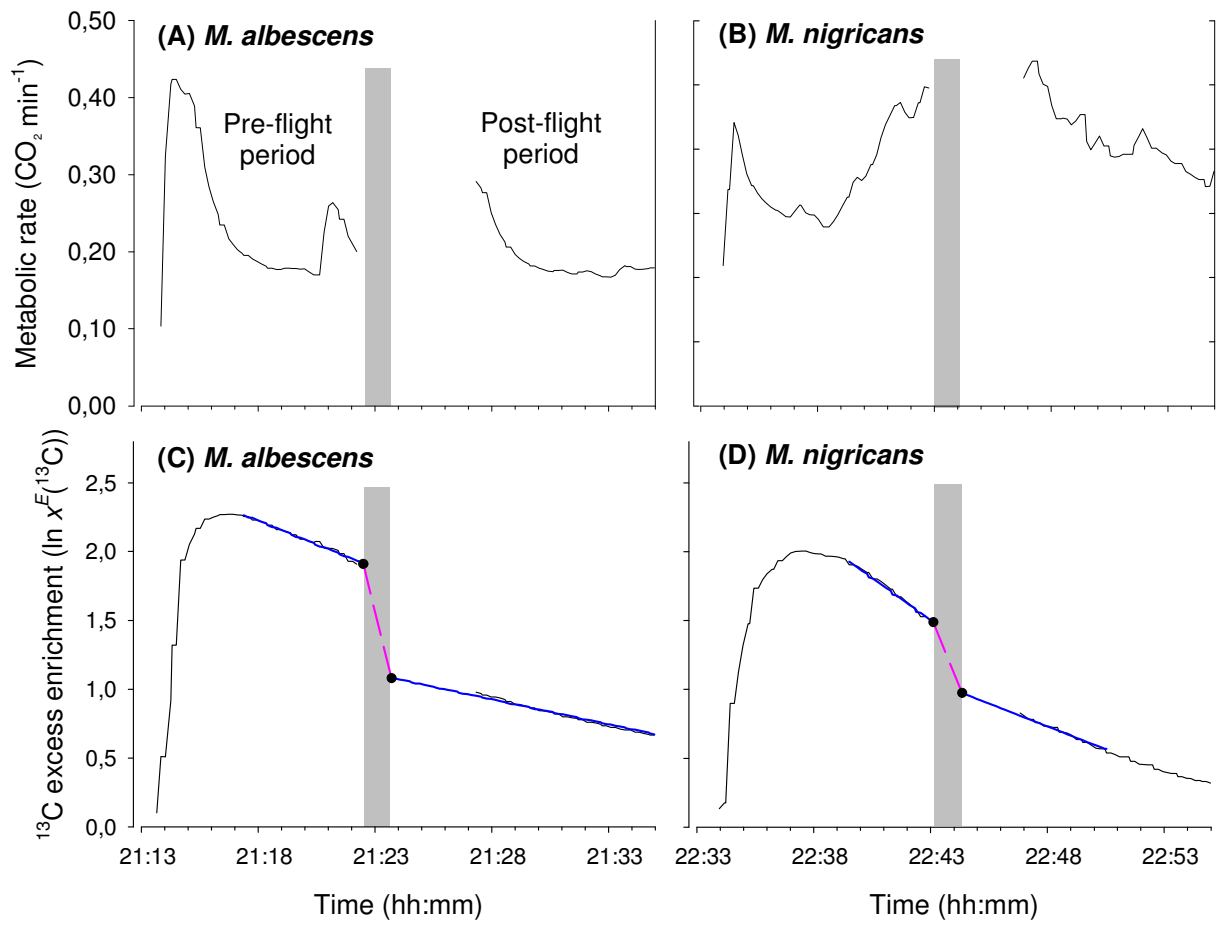



Figure 3

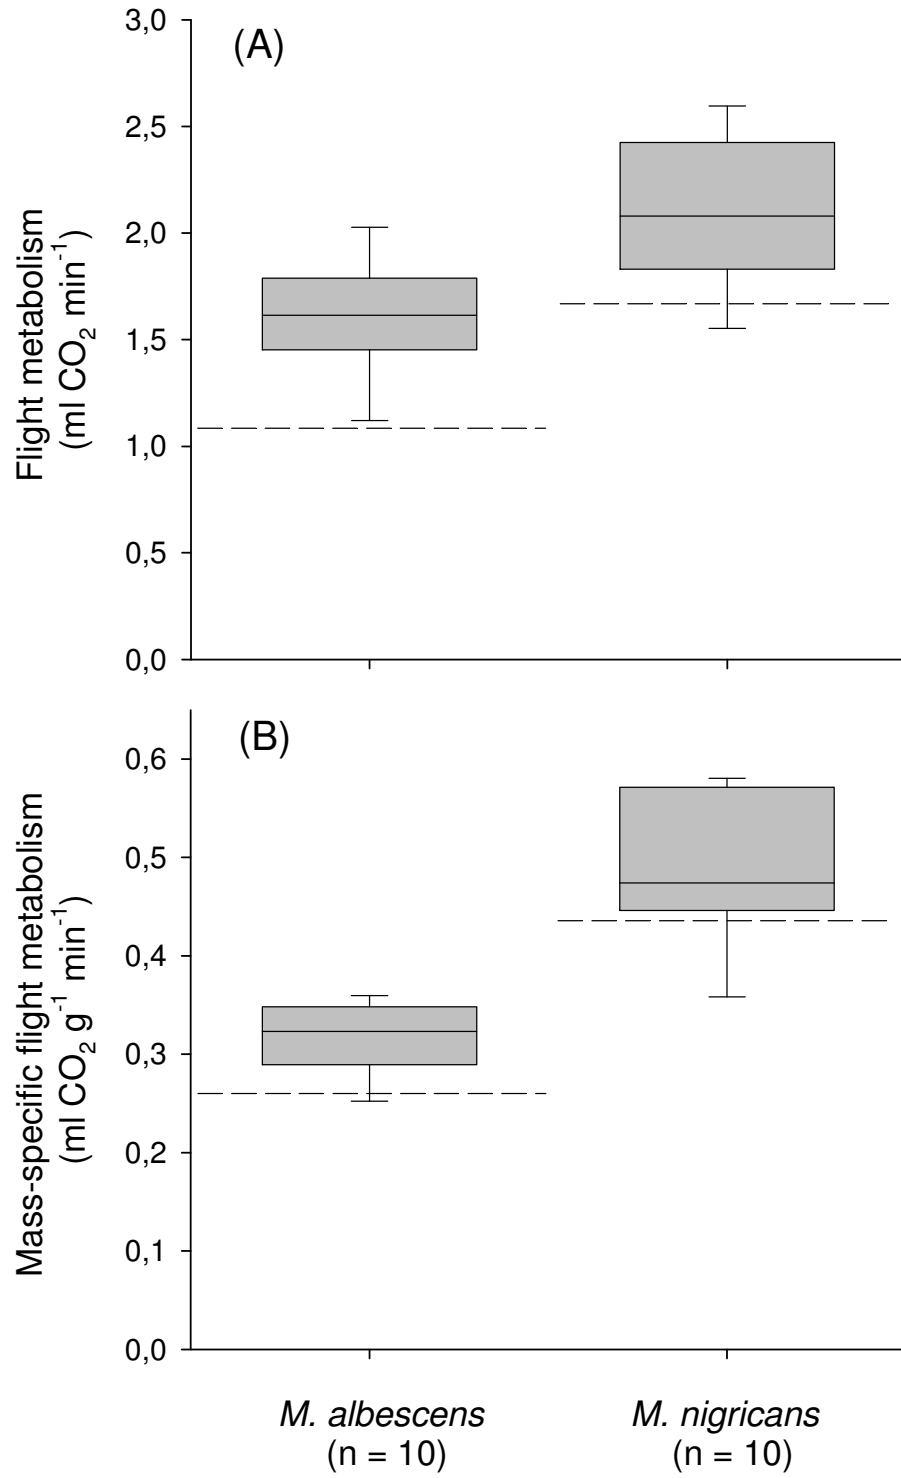

1 **Table 1:** Morphology, flight performance, and metabolic rates of 11 *Myotis nigricans* (Mn) and 11 *M. albescens* (Ma). Abbreviations: AR = Aspect  
 2 ratio, F = female,  $k_c$  = fractional turnover, M = Male,  $m_b$  = body mass, na = not available,  $\dot{V}_{co_2}$  = metabolic rate,  $t$  = duration,  $v$  = flight speed, WL =  
 3 wing loading. \* = individual with damaged wing.

4

| Ind.         | Sex | $m_B$<br>(g) | AR  | WL<br>(N m <sup>2</sup> ) | $t$<br>(s) | U-Turns<br>(n) | $v$<br>(m s <sup>-1</sup> ) | Resting $k_c$<br>(min <sup>-1</sup> ) | Flight $k_c$<br>(min <sup>-1</sup> ) | $\dot{V}_{co_2}$<br>(ml min <sup>-1</sup> ) | Mass-specific $\dot{V}_{co_2}$<br>(ml g <sup>-1</sup> min <sup>-1</sup> ) |
|--------------|-----|--------------|-----|---------------------------|------------|----------------|-----------------------------|---------------------------------------|--------------------------------------|---------------------------------------------|---------------------------------------------------------------------------|
| <i>Mn1</i>   | M   | 4.7          | 6.6 | 4.9                       | 85         | 44             | 2.41                        | 0.126                                 | 0.508                                | 2.12                                        | 0.45                                                                      |
| <i>Mn2</i>   | M   | 4.2          | 6.3 | 4.8                       | 71         | 21             | 1.55                        | 0.083                                 | 0.583                                | 2.45                                        | 0.58                                                                      |
| <i>Mn3</i>   | M   | 4.2          | 6.5 | 4.7                       | 93         | 26             | 2.02                        | 0.053                                 | 0.448                                | 1.82                                        | 0.44                                                                      |
| <i>Mn4</i>   | M   | 4.6          | 6.3 | 4.8                       | 74         | 13             | 1.86                        | 0.068                                 | 0.410                                | 2.06                                        | 0.45                                                                      |
| <i>Mn5</i>   | M   | 3.9          | 6.4 | 4.9                       | 60         | 8              | 2.16                        | 0.048                                 | 0.574                                | 1.89                                        | 0.49                                                                      |
| <i>Mn6</i>   | M   | 3.9          | 6.2 | 4.5                       | 72         | 16             | 2.05                        | 0.038                                 | 0.652                                | 2.10                                        | 0.55                                                                      |
| <i>Mn7</i>   | F   | 4.0          | 6.2 | 4.4                       | 89         | 27             | 1.98                        | 0.144                                 | 0.591                                | 1.84                                        | 0.46                                                                      |
| <i>Mn8</i>   | M   | 4.2          | na  | na                        | 68         | 12             | 1.72                        | 0.064                                 | 0.570                                | 2.42                                        | 0.58                                                                      |
| <i>Mn9</i>   | M   | 4.6          | 6.4 | 5.2                       | 72         | 18             | 1.80                        | 0.028                                 | 0.555                                | 2.61                                        | 0.57                                                                      |
| <i>Mn10</i>  | M   | 4.4          | 6.2 | 5.3                       | 71         | 38             | 1.73                        | 0.109                                 | 0.886                                | 1.52                                        | 0.35                                                                      |
| <i>Mn11*</i> | F   | 3.9          | 8.6 | 5.3                       | 55         | 11             | 1.86                        | 0.132                                 | 0.524                                | 1.71                                        | 0.44                                                                      |
| <i>Ma1</i>   | F   | 5.4          | 6.4 | 6.1                       | 61         | 49             | 3.02                        | 0.061                                 | 0.703                                | 1.75                                        | 0.32                                                                      |
| <i>Ma2</i>   | M   | 4.6          | na  | na                        | 142        | 14             | 0.72                        | 0.088                                 | 0.313                                | 1.61                                        | 0.35                                                                      |
| <i>Ma3</i>   | F   | 4.3          | 6.7 | 4.4                       | 60         | 7              | 1.98                        | 0.103                                 | 0.521                                | 1.09                                        | 0.26                                                                      |

|              |   |     |     |     |     |    |      |       |       |      |      |
|--------------|---|-----|-----|-----|-----|----|------|-------|-------|------|------|
| <i>Ma4</i>   | F | 4.6 | 6.1 | 4.6 | 77  | 32 | 1.35 | 0.063 | 0.610 | 1.46 | 0.32 |
| <i>Ma5</i>   | F | 5.7 | 6.4 | 6.1 | 61  | 5  | 1.09 | 0.069 | 0.807 | 2.04 | 0.36 |
| <i>Ma6</i>   | F | 5.7 | 6.3 | 6.4 | 81  | 16 | 2.86 | 0.075 | 0.593 | 1.71 | 0.30 |
| <i>Ma7</i>   | F | 5.6 | 5.9 | 6.1 | 115 | 30 | 1.71 | 0.073 | 0.532 | 1.41 | 0.25 |
| <i>Ma8</i>   | F | 4.6 | 6.2 | 5.8 | 71  | 27 | 1.34 | 0.067 | 0.688 | 1.58 | 0.35 |
| <i>Ma9</i>   | F | 5.0 | na  | na  | 60  | 15 | 0.96 | 0.064 | 0.725 | 1.62 | 0.32 |
| <i>Ma10</i>  | F | 5.8 | 5.9 | 5.8 | 76  | 28 | 1.62 | 0.077 | 0.686 | 1.91 | 0.33 |
| <i>Ma11*</i> | M | 4.2 | 6.8 | 6.3 | 91  | 12 | 1.42 | 0.069 | 0.564 | 1.12 | 0.27 |

---

1

- 1 **Table 2:** Comparison of morphological, behavioural and respirometry data of the two study species between individuals with damaged wing (Ind.)  
 2 and conspecifics with intact wings. Test statistics are for one-tailed Student t-tests. Significant differences are highlighted in bold. Abbreviations:  
 3 AR = aspect ratio,  $m_b$  = body mass, MR = metabolic rate, WL = Wing loading.

|                                                                           | <i>M. albescens</i> |      |                                           | <i>M. nigricans</i> |      |                                          |
|---------------------------------------------------------------------------|---------------------|------|-------------------------------------------|---------------------|------|------------------------------------------|
|                                                                           | Mean $\pm$ SD       | Ind. | Test                                      | Mean $\pm$ SD       | Ind. | Test                                     |
| <b>Morphology</b>                                                         |                     |      |                                           |                     |      |                                          |
| $m_b$ (g)                                                                 | 5.1 $\pm$ 0.6       | 4.2  | T <sub>9</sub> = 5.1; <b>P = 0.001</b>    | 4.3 $\pm$ 0.3       | 3.9  | T <sub>9</sub> = 4.1, <b>P = 0.003</b>   |
| WL (N m <sup>-2</sup> )                                                   | 5.7 $\pm$ 0.7       | 6.3  | T <sub>8</sub> = 4.3; <b>P = 0.003</b>    | 4.8 $\pm$ 0.3       | 5.3  | T <sub>8</sub> = 4.8; <b>P = 0.001</b>   |
| AR                                                                        | 6.2 $\pm$ 0.3       | 6.9  | T <sub>8</sub> = 5.8; <b>P = 0.001</b>    | 6.3 $\pm$ 0.1       | 8.6  | T <sub>8</sub> = 47; <b>P &lt; 0.001</b> |
| <b>Flight behaviour</b>                                                   |                     |      |                                           |                     |      |                                          |
| Speed (m s <sup>-1</sup> )                                                | 1.67 $\pm$ 0.77     | 1.42 | T <sub>9</sub> = 1.01, P = 0.34           | 1.93 $\pm$ 0.25     | 1.86 | T <sub>9</sub> = 0.85, P = 0.42          |
| U-turns                                                                   | 22.3 $\pm$ 13.4     | 12   | T <sub>9</sub> = 2.43, <b>P = 0.038</b>   | 22.3 $\pm$ 11.6     | 11   | T <sub>9</sub> = 3.1, <b>P = 0.013</b>   |
| <b>Metabolic rates</b>                                                    |                     |      |                                           |                     |      |                                          |
| $\dot{V}_{co_2}$ (ml CO <sub>2</sub> min <sup>-1</sup> )                  | 1.62 $\pm$ 0.27     | 1.12 | T <sub>9</sub> = 5.9, <b>P &lt; 0.001</b> | 2.08 $\pm$ 0.34     | 1.71 | T <sub>9</sub> = 3.5, <b>P = 0.007</b>   |
| Mass-specific $\dot{V}_{co_2}$<br>(ml CO <sub>2</sub> min <sup>-1</sup> ) | 0.32 $\pm$ 0.04     | 0.27 | T <sub>9</sub> = 4.3, <b>P = 0.021</b>    | 0.49 $\pm$ 0.08     | 0.44 | T <sub>9</sub> = 2.1, P = 0.0629         |
